# Supplementary material for: Impaired bone strength and bone microstructure in a novel early-onset osteoporotic rat model with a clinically relevant PLS3 mutation
Source: eLife. 2023 Apr 21;12:e80365. doi: 10.7554/eLife.80365 (PMC10159618; doi:10.7554/eLife.80365)
Supplement: Figure 1—source data 3. [file elife-80365-fig1-data3.xlsx]

## Sheet: PLS3 E1-9
	GAPDH	PLS3 E1-9	ΔCT	ΔΔCT	Relative expression
PLS3E10-16del/0	21.5452	29.1091	7.56387	1.83729	0.279848
	22.513	27.382	4.86906	-0.857532	1.81194
	20.3078	26.9261	6.61839	0.891798	0.538942
WT	23.6	28.6923	5.0923	-0.634286	1.55217
	21.3355	26.9379	5.60237	-0.124215	1.08991
	20.8991	27.3842	6.48509	0.758501	0.59111

## Sheet: PLS3 E10-16
	GAPDH	PLS3 E10-16	ΔCT	ΔΔCT	Relative expression
PLS3E10-16del/0	21.5739	35.1608	13.5868	4.32787	0.0497945
	22.513	35.5886	13.0756	3.81663	0.0709709
	18.2922	36.3709	18.0786	8.81964	0.00221322
WT	22.3968	31.3277	8.93092	-0.32806	1.25532
	21.8412	30.7829	8.94165	-0.317324	1.24602
	21.1671	31.0715	9.90436	0.645384	0.639323

## Sheet: COL1A1
	GAPDH	COL1	ΔCT	ΔΔCT	Relative expression
PLS3E10-16del/0	20.3078	17.3613	-2.94651	-0.952788	1.93561
	21.5452	19.6078	-1.93739	0.0563246	0.961711
	19.5744	18.7739	-0.800485	1.19323	0.437322
WT	21.3355	18.7444	-2.59105	-0.597335	1.51292
	20.9869	18.7215	-2.26533	-0.271608	1.20715
	23.6	22.4752	-1.12477	0.868944	0.547548
