# Supplementary material for: Impaired bone strength and bone microstructure in a novel early-onset osteoporotic rat model with a clinically relevant PLS3 mutation
Source: eLife. 2023 Apr 21;12:e80365. doi: 10.7554/eLife.80365 (PMC10159618; doi:10.7554/eLife.80365)
Supplement: Figure 2—source data 1. [file elife-80365-fig2-data1.xlsx]

## Sheet: 3 months
Group	Yeild Load	Maximum Load	Breaking Load	Stiffness	Post-yield displacement	Work-to-fracture
PLS3E10-16del/0	66.03	87.33	82.84	169.31	0.500561	53.82
	64.48	93.69	86.44	207.61	0.466901	49.1
	62.88	96.44	70.18	215.1	0.930352	87.48
	62.6	91.23	77.73	159.88	0.83407	80.94
	65.56	101.9	60.47	217	1.02817	97.55
	70.11	83.16	52.3	188.03	0.852149	74.2
	81.05	111.56	101.35	209.9	0.775566	96.95
	53.93	93.99	50.63	213.12	1.88376	148.9
WT	105.02	147.92	141.84	279.26	0.631785	105.1
	87.06	111.09	105.57	236.39	0.760094	95.84
	99.81	133.52	110.25	275.83	0.807385	115.6
	72.95	93.19	69.88	224.13	0.833088	81.64
	78.55	109.37	84.41	220.89	0.751511	87.19
	93.41	121.39	82.21	263.41	0.962129	119.4
	80.92	103.08	63.38	101.76	1.11114	130.4
	82.91	122.87	121.8	287.32	0.576712	76

## Sheet: 6 months
Group	Yeild Load	Maximum Load	Breaking Load	Stiffness	Post-yield displacement	Work-to-fracture
PLS3E10-16del/0	122.57	199.82	171.85	361.65	0.896859	178.3
	103.48	148.5	138.87	326.11	0.680619	107
	102.89	156.67	138.09	364.05	0.599759	98.91
	103.84	170.28	168.36	336.59	0.711733	122.8
	121.99	169.69	166.23	380.54	0.604485	116.5
WT	144.91	227.96	150.46	541.42	0.972061	205.3
	123.11	188.09	151	363.44	1.01013	190.8
	147.76	196.26	189.57	405.87	0.427883	105.2
	173.07	209.61	200.56	357.63	0.488037	139.4
	163.65	232.08	204.35	446.14	0.555034	146.3

## Sheet: 9 months
Group	Yeild Load	Maximum Load	Breaking Load	Stiffness	Post-yield displacement	Work-to-fracture
PLS3E10-16del/0	116.68	173.52	166.39	109.101	0.94	219.1
	119.19	154.9	154.76	116.293	0.822	184.9
	113.44	158.66	143.03	109.238	0.867	185.6
	110.97	173.09	182.94	113.2	1.151	233.3
	127.18	179.55	178.97	115.281	1.041	237.9
	92.89	125.54	109.85	85.989	1.04772	169.8
WT	212.21	244.33	235.47	581.56	0.400793	160.4
	109.61	213.17	178.74	364.99	1.14337	215.1
	136.99	230.45	187.19	569.39	0.613598	145.7
	191.26	285.6	285.54	536.27	0.409372	135.9
	173.75	266.84	228.95	432.28	0.773504	218.6
	175.15	258.63	250.59	522.68	0.6067	167
