# Supplementary material for: Impaired bone strength and bone microstructure in a novel early-onset osteoporotic rat model with a clinically relevant PLS3 mutation
Source: eLife. 2023 Apr 21;12:e80365. doi: 10.7554/eLife.80365 (PMC10159618; doi:10.7554/eLife.80365)
Supplement: Figure 2—source data 2. [file elife-80365-fig2-data2.xlsx]

## Sheet: Maximum Load
Group	3 months	6 months	9 months
PLS3E10-16del/0	48.11	31.74	52.83
	37.01	27.77	50.52
	51.66	30.09	27.49
	46.12	33.74	37.18
	35.71	26.74	45.51
WT	72.9	54.62	51.97
	58.94	53.83	87.96
	52.15	46.08	50.54
	61.66	48.86	52.38
	59.9	62.84	38.7
