# Supplementary material for: Impaired bone strength and bone microstructure in a novel early-onset osteoporotic rat model with a clinically relevant PLS3 mutation
Source: eLife. 2023 Apr 21;12:e80365. doi: 10.7554/eLife.80365 (PMC10159618; doi:10.7554/eLife.80365)
Supplement: Figure 2—source data 3. [file elife-80365-fig2-data3.xlsx]

## Sheet: 3 months
Micro-CT assessment of the distal femur from PLS3E10-16del/0 and WT rats
Group	BV/TV	BS/BV	Tb.Th	Tb.N	Tb.Sp	Ct.Th
PLS3E10-16del/0	38.961	22.2952	0.0897056	4.3432	0.140539	0.5075
	38.854	22.3562	0.0894605	4.34314	0.140788	0.5525
	29.5663	24.8949	0.0803377	3.68025	0.191383	0.51
	31.6743	24.0048	0.0833168	3.80167	0.179726	0.51
	31.4095	23.491	0.0851388	3.68921	0.185922	0.485
	37.1535	23.4122	0.0854257	4.34921	0.144501	0.51
	33.5931	24.9684	0.0801012	4.19384	0.158344	0.4825
	22.0536	28.7818	0.0694884	3.17371	0.2456	0.5175
WT	26.5997	26.0162	0.0768752	3.46011	0.212133	0.6525
	34.7013	23.8173	0.0839726	4.13246	0.158014	0.64
	32.1991	23.6974	0.0843974	3.81517	0.177714	0.6525
	35.2806	23.5927	0.084772	4.16183	0.155507	0.705
	29.0413	25.7644	0.0776265	3.74115	0.189671	0.64
	24.6918	28.6125	0.0698995	3.53247	0.213189	0.616667
	41.3112	20.6762	0.0967297	4.27079	0.137419	0.6025
	27.2024	26.9235	0.0742845	3.66192	0.198796	0.5925

## Sheet: 6 months
Micro-CT assessment of the distal femur from PLS3E10-16del/0 and WT rats
Group	BV/TV	BS/BV	Tb.Th	Tb.N	Tb.Sp	Ct.Th
PLS3E10-16del/0	46.7823	15.394	0.129921	3.60084	0.147792	0.62
	27.9435	16.8662	0.118581	2.3565	0.305778	0.56
	38.1496	19.2606	0.103839	3.67392	0.16835	0.66
	34.4236	19.2935	0.103662	3.32075	0.197475	0.64
	38.0227	18.2071	0.109847	3.46141	0.179052	0.61
WT	40.2647	19.2791	0.103739	3.88134	0.153904	0.66
	29.4055	20.8795	0.0957875	3.06987	0.229959	0.71
	39.0638	21.5091	0.092984	4.20113	0.145047	0.65
	46.7414	17.3492	0.115279	4.05462	0.131353	0.77
	36.2987	19.8015	0.101003	3.59384	0.177251	0.79

## Sheet: 9 months
Micro-CT assessment of the distal femur from PLS3E10-16del/0 and WT rats
Group	BV/TV	BS/BV	Tb.Th	Tb.N	Tb.Sp	Ct.Th
PLS3E10-16del/0	48.2795	17.2703	0.115806	4.16902	0.124059	0.58
	35.9173	22.3166	0.0896195	4.00775	0.159897	0.56
	29.8462	21.904	0.0913074	3.26876	0.214619	0.59
	32.9274	23.072	0.0866853	3.7985	0.176577	0.64
	44.4158	17.4851	0.114383	3.88307	0.143145	0.67
WT	26.4129	18.7949	0.106412	2.48214	0.296467	0.75
	35.8742	20.0001	0.0999996	3.58743	0.178751	0.83
	34.1757	19.5597	0.102251	3.34233	0.196941	0.84
	44.4191	16.6293	0.12027	3.69329	0.150492	0.91
	46.4321	15.96	0.125313	3.70529	0.144572	0.86

## Sheet: Tissue BMD of cortices
Group	3 months	6 months	9 months
PLS3E10-16del/0	1904.52	2200.08	2052.95
	1945.17	2067.18	2150.78
	1949.54	2255.33	2175.19
	1898.93	2021.88	2009.2
	1949.88	2147.38	2161.1
	1839.65
	1901.35
	1885.99
WT	2044.24	2191	2083.12
	2033.38	2230.35	2188.11
	1873.88	2071.21	2098.08
	1955.7	2062.77	2110.39
	2035.9	2161.68	1989.23
	1955.87
	1871.12
	1955.23

## Sheet: Tissue BMD of trabecular
Group	3 months	6 months	9 months
PLS3E10-16del/0	440.985	562.991	530.774
	477.506	590.398	509.723
	519.307	543.822	514.498
	376.417	506.124	528.891
	444.213	546.412	486.317
	397.267
	392.761
	428.038
WT	382.807	553.642	406.414
	460.254	534.339	473.336
	475.085	623.287	542.006
	471.621	560.166	608.726
	417.075	411.896	609.769
	363.907
	392.828
	522.501

## Sheet: Histomorphometric evaluation
Histomorphometric evaluation of L4 from PLS3E10-16del/0 and WT rats
3 months
Group	%Tb.Ar	Tb.Th	Tb.N	Tb.Sp
PLS3E10-16del/0	29.9072	60.4601	4.94661	141.699
	28.807	44.2928	6.50378	109.464
	33.0969	64.2638	5.15017	129.905
	31.4755	48.0368	6.55237	104.58
	33.1966	63.0065	5.26876	126.791
	31.6868	58.3657	5.42901	125.83
	28.5563	44.89	6.36139	112.308
WT	28.2443	41.2403	6.8487	104.773
	37.8381	64.0875	5.90413	105.286
	30.0147	56.5608	5.30663	131.883
	33.5413	58.812	5.70313	116.53
	32.6154	62.5576	5.21366	129.246
	32.0663	39.8818	8.04033	84.4912
	29.2433	39.4724	7.40855	95.5068
6 months
Group	%Tb.Ar	Tb.Th	Tb.N	Tb.Sp
PLS3E10-16del/0	32.9668	52.6041	6.26697	106.963
	41.8732	71.2613	5.87601	98.9223
	22.1548	65.9515	3.35925	231.734
	27.7769	34.413	8.07162	89.4778
	30.9957	73.492	4.21756	163.612
WT	27.4438	67.5247	4.06426	178.523
	24.5695	58.3843	4.20824	179.245
	24.4982	66.8671	3.66372	206.08
	44.4188	71.1358	6.24422	89.0122
	35.8734	57.0963	6.28296	102.064
9 months
Group	%Tb.Ar	Tb.Th	Tb.N	Tb.Sp
PLS3E10-16del/0	34.745	64.2305	5.40943	120.632
	30.0922	56.4345	5.33223	131.104
	30.0425	65.5532	4.58292	152.648
	31.1289	48.4436	6.4258	107.179
	31.9585	47.6979	6.70019	101.552
WT	29.9461	72.3338	4.13999	169.213
	25.4841	61.7389	4.12772	180.525
	31.9168	68.7467	4.64267	146.647
	40.8401	69.6798	5.86111	100.936
	36.9424	66.9778	5.51563	114.325
