# Supplementary material for: Impaired bone strength and bone microstructure in a novel early-onset osteoporotic rat model with a clinically relevant PLS3 mutation
Source: eLife. 2023 Apr 21;12:e80365. doi: 10.7554/eLife.80365 (PMC10159618; doi:10.7554/eLife.80365)
Supplement: Figure 2—source data 4. [file elife-80365-fig2-data4.xlsx]

## Sheet: Tb.MAR in L4
Original data - Figure 2G Typical images of unstained and uncalcified vertebra of PLS3E10-16del/0 rats and comparison of mineral apposition rate (n= 4 per group)
6 months
Groups	Tb. MAR in L4
PLS3E10-16del/0	1.885
	1.795
	1.895
	1.88
WT	3.34
	3.035
	2.99
	3.21
9 months
Groups	Tb. MAR in L4
PLS3E10-16del/0	1.3
	2.1
	1.885
	1.765
WT	3.14
	2.625
	3.35
	3.195

## Sheet: Histomorphometryaftertreatment
Original data - Figure 4B - Histomorphometric analysis of L4 after treatment
Group	%Tb.Ar	Tb.Th	Tb.N	Tb.Sp
Alendronate	27.2575	52.9757	5.14528	141.377
	33.5652	44.2901	7.5785	87.6622
	24.868	45.1482	5.50807	136.404
	22.3009	40.6812	5.48186	141.738
	26.5104	40.8693	6.48662	113.294
Teriparatide	39.5746	85.8049	4.61217	131.013
	40.4565	82.9767	4.87564	122.124
	41.9472	58.2724	7.19846	80.6461
	29.5163	59.3132	4.97634	141.638
	44.5151	84.7029	5.25544	105.576
Control	35.8696	37.3326	9.6081	66.7462
	27.953	41.5394	6.72927	107.065
	26.2766	44.6564	5.88417	125.291
	27.7769	34.413	8.07162	89.4778
	30.9957	73.492	4.21756	163.612

## Sheet: Ec. MAR after treatment
Original data - Figure 4E Comparison of Ec.MAR in the tibial cortex among three treatment groups. (n=5 per group)
Group	Ec. MAR
Alendronate	2.98142
	3.05325
	1.74197
	3.51992
	2.46212
Teriparatide	4.77714
	5.38892
	5.71886
	5.17939
	5.41303
Control	3.58222
	3.98722
	4.03869
	4.03764
	4.5005
