# Supplementary material for: Impaired bone strength and bone microstructure in a novel early-onset osteoporotic rat model with a clinically relevant PLS3 mutation
Source: eLife. 2023 Apr 21;12:e80365. doi: 10.7554/eLife.80365 (PMC10159618; doi:10.7554/eLife.80365)
Supplement: Figure 3—source data 1. [file elife-80365-fig3-data1.xlsx]

## Sheet: Sheet1
Microstructural parameters of femurs by micro-CT after treatment
Group	TBMD of cortices	TBMD of trabeculae	BV/TV	BS/BV	Tb.Th	Tb.N	Tb.Sp	Ct.Th
Alendronate	1792.73	831.955	51.3311	53.989	0.0370446	13.8566	0.0351233	0.66
	1825.25	853.477	60.974	53.6706	0.0372643	16.3626	0.0238508	0.66
	1757.93	881.759	62.0553	54.111	0.036961	16.7894	0.0226003	0.69
	1972.18	832.19	58.6998	53.7905	0.0371813	15.7875	0.0261601	0.68
	1746.59	823.48	60.3482	52.7307	0.0379286	15.911	0.024921	0.65
	1736.61	701.004	54.2942	53.9561	0.0370672	14.6475	0.0312038	0.65
	1848.79	887.476	63.6263	51.4708	0.038857	16.3745	0.0222137	0.66
	1758.47	856	72.5656	101.109	0.0197807	36.685	0.00747838	0.73
Teriparatide	1706.84	748.824	58.8947	53.1048	0.0376614	15.6379	0.0262856	0.7
	1770.77	756.323	66.3734	52.4593	0.0381248	17.4095	0.0193151	0.66
	1650.28	791.701	59.6644	52.9624	0.0377626	15.7998	0.0255291	0.66
	1797.95	1139.76	78.4848	51.8241	0.0385921	20.337	0.0105793	0.64
	1697.4	571.936	32.0846	54.0967	0.0369708	8.67836	0.0782584	0.64
	1745.42	670.166	56.3985	53.6209	0.0372989	15.1207	0.0288356	0.63
	1757.89	830.341	51.6574	102.111	0.0195865	26.3739	0.0183297	0.68
	1753.25	703.862	47.5513	102.746	0.0194656	24.4285	0.0214703	0.64
Control	1731.26	579.738	44.6854	54.1876	0.0369088	12.107	0.0456883	0.63
	1715.49	611.147	41.6698	54.0595	0.0369963	11.2632	0.0517882	0.65
	2017.11	510.261	32.6904	54.1047	0.0369654	8.84351	0.076119	0.65
	1720.2	652.612	48.8396	54.2975	0.0368341	13.2594	0.0385844	0.61
	1712.26	508.949	43.9182	54.9778	0.0363783	12.0726	0.0464536	0.62
	1696.22	692.697	57.1327	53.9016	0.0371046	15.3977	0.02784	0.63
	1728.37	532.657	33.8411	53.8379	0.0371485	9.10968	0.0726249	0.59
	1791.93	573.886	46.181	102.912	0.0194341	23.7629	0.0226483	0.63
TBMD: tissue bone mineral density
