# Supplementary material for: Impaired bone strength and bone microstructure in a novel early-onset osteoporotic rat model with a clinically relevant PLS3 mutation
Source: eLife. 2023 Apr 21;12:e80365. doi: 10.7554/eLife.80365 (PMC10159618; doi:10.7554/eLife.80365)
Supplement: Figure 4—source data 1. [file elife-80365-fig4-data1.xlsx]

## Sheet: three-point binding tests
Effects of treatment on the mechanical strength of femoral diaphysis
Group	Maximum Load	Yeild Load	Breaking Load	post-yeild displacement	work-to-failure
Alendronate	165.91	67.03	121.24	1.85936	254.5
	160.56	112.49	160.34	0.55024	189.5
	165.06	102.88	155.26	1.01296	231
	156.18	103.51	155.83	0.948473	197
	152.78	102.23	106.57	1.31399	208.8
	151.79	92.32	141.12	0.74097	120.8
	168.8	110.97	157.93	0.855852	225.9
	162.07	105.21	161.75	0.793043	209.6
Teriparatide	174.43	121.24	163.73	0.850638	235.9
	179.84	69.19	175.03	1.68019	244.4
	182.83	129.2	153.47	0.934248	262.3
	195.97	125.69	151.2	0.976261	188.8
	180.73	119.58	161.98	0.958486	180.9
	179.71	140.38	169.18	0.609873	141.2
	170.53	134.34	170.42	1.05342	300.9
	193.39	110.55	177.26	0.551906	177
Control	137.2	62.4	132.13	1.46471	171.6
	157.91	102.88	145.83	1.02856	231.2
	153.14	66.99	153.14	1.49868	195
	129.68	77.3	111.94	0.740333	102.3
	181.97	102.15	167.64	0.740816	138.6
	154.53	101.6	114.74	1.02935	152.8
	156.27	91.35	149.46	0.856349	135
	163.06	98	163.06	0.773279	170.2

## Sheet: indentation testing
Effects of treatment on the mechanical strength of L5
Group	Maximum Load
Alendronate	80.67
	42.74
	73.21
	56.88
	46.62
	46.71
	60.06
Teriparatide	85.5
	79.05
	82.37
	69.17
	93.08
	48.97
	47.57
	50.21
Control	27.77
	30.09
	63.13
	33.74
	28.99
	38.07
	26.74
	39.61
